# Supplementary material
Source: PubMed Central journal article supplement (PMC5645756)
Supplement: ac7b01452_si_001.pdf [file ac7b01452_si_001.pdf]

# Non-destructive redox quantification reveals glassmaking of rare French Gothic stained glasses

Myrtille O.J.Y. Hunault,<sup>\*,†,‡,||</sup> Claudine Loisel,<sup>\*,†</sup> Fanny Bauchau,<sup>†</sup> Quentin  
Lemasson,<sup>¶</sup> Claire Pacheco,<sup>¶</sup> Laurent Pichon,<sup>¶</sup> Brice Moignard,<sup>¶</sup> Karine Boulanger,<sup>§</sup>  
Michel Hérold,<sup>§</sup> Georges Calas,<sup>‡</sup> and Isabelle Pallot-Frossard<sup>†,¶</sup>

<sup>†</sup>*Laboratoire de Recherche des Monuments Historiques, CRCC, MNHN, USR CNRS  
3224, Ministère de la Culture et de la Communication, 29 rue de Paris, 77420  
Champs-sur-Marne, France*

<sup>‡</sup>*Institut de minéralogie, de physique des matériaux et de cosmochimie, Sorbonne  
Universités, UPMC, UMR CNRS 7590, 4 place Jussieu, 75005 Paris, France*

<sup>¶</sup>*Centre de Recherche et de Restauration des Musées de France, Palais du Louvre, 14  
quai François Mitterrand, 75001 Paris, France*

<sup>§</sup>*Centre André Chastel, Sorbonne Universités, Université Paris 4, 2 rue Vivienne,  
75003 Paris, France*

E-mail: myrtille.hunault@impmc.upmc.fr; claudine.loisel@culture.gouv.fr

|                                                            |          |
|------------------------------------------------------------|----------|
| <b>Striped-glass throughout medieval Europe .....</b>      | <b>2</b> |
| <b>Chemical compositions of the glasses .....</b>          | <b>4</b> |
| <b>Indoor vs outdoor faces of the glass .....</b>          | <b>4</b> |
| <b>Manganese-barium correlation .....</b>                  | <b>6</b> |
| <b>Manganese in red flashed-glasses .....</b>              | <b>7</b> |
| <b>Composition mappings of black opaque staining .....</b> | <b>8</b> |
| <b>References .....</b>                                    | <b>9</b> |

---

<sup>||</sup>Current address: SOLEIL Synchrotron, l'Orme des merisiers Saint-Aubin BP48, 91192 Gif-Sur-Yvette Cedex, France

## Striped-glass throughout medieval Europe

The extended color palette of glass, detailed painting, complex engraving and high number of rare glasses used in the rose of the apocalypse comply with the precious royal aura of the Saint-Chapelle in Paris and at the same time demonstrate the range of perfection and mastery achieved by glassmakers and glaziers at the end of the Middle Ages. Among the precious rare glasses used in the rose, one can find striped glasses, which consist in colorless glass with colored stripes (Figure S-1).

The most ancient striped glasses have been found in Austria. In France, during the 15th and 16th centuries, most of the striped glasses show only red stripes and were found in Parisian monuments: Saint-Merry church (window 114, circa 1540), Saint-Gervais church (window 16 of the Wisdom of Salomon, 1531), Saint-Etienne-du-Mont church (Saint nom de Jésus window, 1540) and Saint-Germain-l'Auxerois church, or other in French cities: Madeleine church in Troyes (Passion window, circa 1494), Sainte-Marie cathedral in Auch (window 8, Saint-Louis chapel, 1513) and Saint-Pierre church in Dreux).

Triple-colored striped glasses are exceptional and were only found in: the rose of the Apocalypse of the Sainte-Chapelle in Paris (Figure S-1.a-f), the *boureau de la Flagellation* (Figure S-1.g), Cluny Museum (Paris, circa 1490), Saint-Gervais church in Paris (window 9 of Sainte Isabelle of France, circa 1510) as well as in Switzerland (Saint-Christophe window, museum of Basel, circa 1510/1525).<sup>1</sup> The later has been assigned to an Alsatian glazier by Hans Baldung Grien or Nuremberg.<sup>1,2</sup> The small number of striped glasses known today, together with the narrow period of production might suggest a common origin for these glasses.

The usage of the word “Venetian” was defined by the art historian Jean Lafond according to the Swiss Saint-Christophe window for such glasses, in which the very thin stripes resemble the filigree glasses made in Murano’s workshops at the same period.<sup>3</sup> The Venetian origin of the striped glasses found in the Sainte-Chapelle in Paris is refuted in this work according to the chemical composition (see main text). It seems that the usage of such striped-glasses stopped after ca. 1550.

The name “Venetian glass” is an echo to the naming “*à-la-façon-de-Venise*” used to define the glassware produced in Europe from the 16th century and imitating the filigree glass *Venetian cristallo*. This “*à-la-façon-de-Venise*” glassware was produced by Venetian glassmakers who escaped from Murano island and developed their own business in Northern Europe. This was unraveled from finds in Antwerp (Belgium), Amsterdam (the Netherlands) and London (UK).<sup>4</sup> However, the chemical composition of this “*à-la-façon-de-Venise*” glassware is very different: soda-lime silicate glass (>10 wt % of Na<sub>2</sub>O). Surprisingly, window glass produced from 14th to 17th centuries in Belgium present significantly different chemical composition from the glassware production technology.<sup>5</sup> As a consequence, the results of the present study, revealing potash-lime silicate glasses, strongly support that the striped glass of the present work was not produced using the imported Venetian glassmaking skills and therefore should not be named “Venetian glass” nor “*à-la-façon-de-Venise*”.

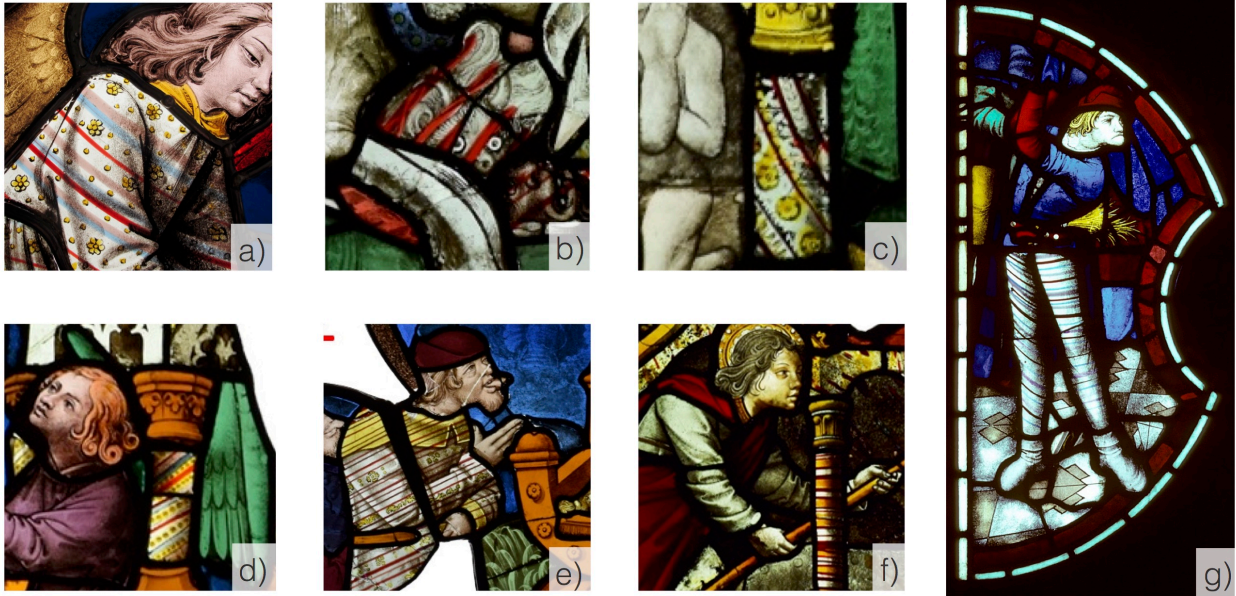

**Figure S-1:** Striped glasses in the stained glass windows of the apocalypse rose of the Sainte-Chapelle in Paris: details of panels a) T9, b) E2, c) F2, d) M2, e) O2, f) T1; g) *Bourreau de la flagellation*, Cluny Museum (Paris, France), circa 1490. Courtesy of Michel Hérold, Centre André Chastel.

## Chemical compositions of the glasses

The composition of ancient glasses has been extensively used to determine geographical and temporal origins. However, the melting process induces the loss of the information about the origin of the chemical species and blurs chemical correlations. Since some chemical components could be added on purpose while others added as impurities from the raw materials, a major questioning concerns the intentional mastering of the chemical composition and thus the control of the final resulting color by the medieval glassmaker (i.e. the glass recipe). To relate the chemical composition to a place and time of production, it is necessary to determine how they influence the variation of the chemical composition. The chemical concentrations (Table S-1) are given in mass percentages of total oxides for major elements and part per million of total oxides for minor and trace elements. For each glass area (based on their color difference), the concentrations are obtained by integration over the total area of the colored stripe. The standard deviations are calculated for each area from five sub-maps of equal areas. As a consequence these standard deviations include the variation due to the statistical error and the heterogeneities on the glass.

## Indoor vs outdoor faces of the glass

We distinguish here the side of the glass that is on the outside of the window and undergo atmospheric weathering: “outdoor” face, from the side that is inside the building: “indoor” face.

The chemical composition extracted from the PIXE-PIGE mappings of each face is given in Table S-1. In the base glass, we observe that the concentration of sulphur is much higher and heterogeneous ( $4.95 \pm 1.70$  wt %  $\text{SO}_3$ ) on the outdoor face of the glass than on the indoor face ( $0.56 \pm 0.06$  wt %  $\text{SO}_3$ ). This might be assigned to atmospheric pollution although the glass had been restored.

**Table S-1:** Chemical compositions extracted from each area of the PIXE-PIGE mapping.

|       | Base glass |         | inside             |          | Base glass |          | outside |                    | Blue stripe |         | Purple Stripe |         | Red stripe |         | Silver Yellow |         | paint    |         | Grisaille |          | paint   |          | Brill D |         |
|-------|------------|---------|--------------------|----------|------------|----------|---------|--------------------|-------------|---------|---------------|---------|------------|---------|---------------|---------|----------|---------|-----------|----------|---------|----------|---------|---------|
|       | mapping    | average | standard deviation | mapping  | average    | mapping  | average | standard deviation | mapping     | average | mapping       | average | mapping    | average | mapping       | average | mapping  | average | mapping   | average  | mapping | average  | mapping | average |
|       | 1.08(5)    | 0.06(3) | 0.03(7)            | 0.81(8)  | 0.03(1)    | 0.99(0)  | 0.03(1) | 0.03(1)            | 0.99(0)     | 0.03(1) | 0.94(1)       | 0.01(4) | 1.07(1)    | 0.03(5) | 0.87(7)       | 0.09(2) | 1.38(7)  |         |           | 0.87(7)  | 0.09(2) | 1.38(7)  |         |         |
| Na2O* | 4.04(4)    | 0.11(2) | 0.22(6)            | 4.16(0)  | 0.07(5)    | 3.39(8)  | 0.09(7) | 0.07(5)            | 3.39(8)     | 0.09(7) | 3.94(0)       | 0.03(8) | 3.95(8)    | 0.18(5) | 0.72(1)       | 0.33(6) | 3.52(5)  |         |           | 0.72(1)  | 0.33(6) | 3.52(5)  |         |         |
| MgO   | 2.37(1)    | 0.02(6) | 0.05(9)            | 2.62(8)  | 0.04(2)    | 2.71(7)  | 0.03(7) | 0.04(2)            | 2.71(7)     | 0.03(7) | 2.62(3)       | 0.08(0) | 2.67(2)    | 0.04(4) | 2.18(6)       | 0.47(0) | 5.18(4)  |         |           | 2.18(6)  | 0.47(0) | 5.18(4)  |         |         |
| Al2O3 | 53.35(1)   | 0.47(7) | 1.14(9)            | 53.34(6) | 0.28(2)    | 51.27(1) | 0.32(6) | 0.28(2)            | 51.27(1)    | 0.32(6) | 54.48(5)      | 0.52(4) | 52.75(5)   | 0.56(3) | 34.09(7)      | 9.60(9) | 55.98(9) |         |           | 34.09(7) | 9.60(9) | 55.98(9) |         |         |
| SiO2  | 3.94(6)    | 0.03(3) | 0.10(8)            | 3.92(8)  | 0.06(4)    | 3.59(8)  | 0.03(9) | 0.06(4)            | 3.59(8)     | 0.03(9) | 3.87(5)       | 0.07(4) | 3.78(8)    | 0.06(2) | 2.18(9)       | 0.45(1) | 3.67(7)  |         |           | 2.18(9)  | 0.45(1) | 3.67(7)  |         |         |
| P2O5  | 0.56(9)    | 0.06(9) | 1.70(2)            | 1.14(0)  | 0.30(0)    | 2.41(4)  | 0.56(8) | 0.30(0)            | 2.41(4)     | 0.56(8) | 1.20(6)       | 0.40(6) | 2.93(6)    | 0.87(5) | 3.03(9)       | 4.12(9) | 0.25(7)  |         |           | 3.03(9)  | 4.12(9) | 0.25(7)  |         |         |
| SO3   | 0.29(0)    | 0.01(3) | 0.01(4)            | 0.18(6)  | 0.00(8)    | 0.18(7)  | 0.00(8) | 0.00(8)            | 0.18(7)     | 0.00(8) | 0.23(6)       | 0.00(7) | 0.25(7)    | 0.01(1) | 0.55(6)       | 0.05(7) | 0.15(7)  |         |           | 0.55(6)  | 0.05(7) | 0.15(7)  |         |         |
| Cl    | 16.54(1)   | 0.17(0) | 0.65(4)            | 15.81(1) | 0.17(0)    | 14.10(4) | 0.21(1) | 0.17(0)            | 14.10(4)    | 0.21(1) | 16.64(0)      | 0.07(8) | 15.23(1)   | 0.24(8) | 8.78(5)       | 4.52(7) | 11.46(6) |         |           | 8.78(5)  | 4.52(7) | 11.46(6) |         |         |
| K2O   | 14.57(1)   | 0.27(9) | 0.30(5)            | 13.51(3) | 0.11(1)    | 11.97(7) | 0.23(4) | 0.11(1)            | 11.97(7)    | 0.23(4) | 12.58(1)      | 0.21(6) | 14.14(4)   | 0.10(2) | 9.34(3)       | 3.21(8) | 14.49(3) |         |           | 9.34(3)  | 3.21(8) | 14.49(3) |         |         |
| CaO   | 0.15(5)    | 0.01(0) | 0.01(2)            | 0.15(0)  | 0.00(5)    | 0.16(2)  | 0.01(1) | 0.00(5)            | 0.16(2)     | 0.01(1) | 0.15(2)       | 0.05(6) | 0.15(3)    | 0.00(6) | 0.22(6)       | 0.03(3) | 0.46(3)  |         |           | 0.22(6)  | 0.03(3) | 0.46(3)  |         |         |
| TiO2  | 1.19(8)    | 0.02(0) | 0.03(6)            | 1.28(4)  | 0.05(7)    | 7.18(6)  | 0.28(0) | 0.05(7)            | 7.18(6)     | 0.28(0) | 0.96(6)       | 0.02(8) | 1.28(2)    | 0.07(3) | 0.90(4)       | 0.34(2) | 0.59(2)  |         |           | 0.90(4)  | 0.34(2) | 0.59(2)  |         |         |
| MnO   | 1.02(3)    | 0.18(9) | 0.02(6)            | 1.60(5)  | 0.02(7)    | 0.92(2)  | 0.09(9) | 0.02(7)            | 0.92(2)     | 0.09(9) | 0.75(9)       | 0.01(8) | 0.78(8)    | 0.03(4) | 25.56(0)      | 9.50(5) | 0.53(9)  |         |           | 25.56(0) | 9.50(5) | 0.53(9)  |         |         |
| Fe2O3 | 0.09(4)    | 0.02(1) | 0.00(6)            | 0.25(7)  | 0.00(5)    | 0.16(5)  | 0.00(9) | 0.00(5)            | 0.16(5)     | 0.00(9) | 1.06(1)       | 0.03(9) | 0.09(8)    | 0.00(7) | 1.91(8)       | 0.68(3) | 0.40(0)  |         |           | 1.91(8)  | 0.68(3) | 0.40(0)  |         |         |
| CuO   |            |         |                    |          |            |          |         |                    |             |         |               |         |            |         |               |         |          |         |           |          |         |          |         |         |
|       |            |         |                    |          |            |          |         |                    |             |         |               |         |            |         |               |         |          |         |           |          |         |          |         |         |
|       |            |         |                    |          |            |          |         |                    |             |         |               |         |            |         |               |         |          |         |           |          |         |          |         |         |
|       |            |         |                    |          |            |          |         |                    |             |         |               |         |            |         |               |         |          |         |           |          |         |          |         |         |
|       |            |         |                    |          |            |          |         |                    |             |         |               |         |            |         |               |         |          |         |           |          |         |          |         |         |
|       |            |         |                    |          |            |          |         |                    |             |         |               |         |            |         |               |         |          |         |           |          |         |          |         |         |
|       |            |         |                    |          |            |          |         |                    |             |         |               |         |            |         |               |         |          |         |           |          |         |          |         |         |
|       |            |         |                    |          |            |          |         |                    |             |         |               |         |            |         |               |         |          |         |           |          |         |          |         |         |
|       |            |         |                    |          |            |          |         |                    |             |         |               |         |            |         |               |         |          |         |           |          |         |          |         |         |
|       |            |         |                    |          |            |          |         |                    |             |         |               |         |            |         |               |         |          |         |           |          |         |          |         |         |
|       |            |         |                    |          |            |          |         |                    |             |         |               |         |            |         |               |         |          |         |           |          |         |          |         |         |
|       |            |         |                    |          |            |          |         |                    |             |         |               |         |            |         |               |         |          |         |           |          |         |          |         |         |
|       |            |         |                    |          |            |          |         |                    |             |         |               |         |            |         |               |         |          |         |           |          |         |          |         |         |
|       |            |         |                    |          |            |          |         |                    |             |         |               |         |            |         |               |         |          |         |           |          |         |          |         |         |
|       |            |         |                    |          |            |          |         |                    |             |         |               |         |            |         |               |         |          |         |           |          |         |          |         |         |
|       |            |         |                    |          |            |          |         |                    |             |         |               |         |            |         |               |         |          |         |           |          |         |          |         |         |
|       |            |         |                    |          |            |          |         |                    |             |         |               |         |            |         |               |         |          |         |           |          |         |          |         |         |
|       |            |         |                    |          |            |          |         |                    |             |         |               |         |            |         |               |         |          |         |           |          |         |          |         |         |
|       |            |         |                    |          |            |          |         |                    |             |         |               |         |            |         |               |         |          |         |           |          |         |          |         |         |
|       |            |         |                    |          |            |          |         |                    |             |         |               |         |            |         |               |         |          |         |           |          |         |          |         |         |
|       |            |         |                    |          |            |          |         |                    |             |         |               |         |            |         |               |         |          |         |           |          |         |          |         |         |
|       |            |         |                    |          |            |          |         |                    |             |         |               |         |            |         |               |         |          |         |           |          |         |          |         |         |
|       |            |         |                    |          |            |          |         |                    |             |         |               |         |            |         |               |         |          |         |           |          |         |          |         |         |
|       |            |         |                    |          |            |          |         |                    |             |         |               |         |            |         |               |         |          |         |           |          |         |          |         |         |
|       |            |         |                    |          |            |          |         |                    |             |         |               |         |            |         |               |         |          |         |           |          |         |          |         |         |
|       |            |         |                    |          |            |          |         |                    |             |         |               |         |            |         |               |         |          |         |           |          |         |          |         |         |
|       |            |         |                    |          |            |          |         |                    |             |         |               |         |            |         |               |         |          |         |           |          |         |          |         |         |
|       |            |         |                    |          |            |          |         |                    |             |         |               |         |            |         |               |         |          |         |           |          |         |          |         |         |
|       |            |         |                    |          |            |          |         |                    |             |         |               |         |            |         |               |         |          |         |           |          |         |          |         |         |
|       |            |         |                    |          |            |          |         |                    |             |         |               |         |            |         |               |         |          |         |           |          |         |          |         |         |
|       |            |         |                    |          |            |          |         |                    |             |         |               |         |            |         |               |         |          |         |           |          |         |          |         |         |
|       |            |         |                    |          |            |          |         |                    |             |         |               |         |            |         |               |         |          |         |           |          |         |          |         |         |
|       |            |         |                    |          |            |          |         |                    |             |         |               |         |            |         |               |         |          |         |           |          |         |          |         |         |
|       |            |         |                    |          |            |          |         |                    |             |         |               |         |            |         |               |         |          |         |           |          |         |          |         |         |
|       |            |         |                    |          |            |          |         |                    |             |         |               |         |            |         |               |         |          |         |           |          |         |          |         |         |
|       |            |         |                    |          |            |          |         |                    |             |         |               |         |            |         |               |         |          |         |           |          |         |          |         |         |
|       |            |         |                    |          |            |          |         |                    |             |         |               |         |            |         |               |         |          |         |           |          |         |          |         |         |
|       |            |         |                    |          |            |          |         |                    |             |         |               |         |            |         |               |         |          |         |           |          |         |          |         |         |
|       |            |         |                    |          |            |          |         |                    |             |         |               |         |            |         |               |         |          |         |           |          |         |          |         |         |
|       |            |         |                    |          |            |          |         |                    |             |         |               |         |            |         |               |         |          |         |           |          |         |          |         |         |
|       |            |         |                    |          |            |          |         |                    |             |         |               |         |            |         |               |         |          |         |           |          |         |          |         |         |
|       |            |         |                    |          |            |          |         |                    |             |         |               |         |            |         |               |         |          |         |           |          |         |          |         |         |
|       |            |         |                    |          |            |          |         |                    |             |         |               |         |            |         |               |         |          |         |           |          |         |          |         |         |
|       |            |         |                    |          |            |          |         |                    |             |         |               |         |            |         |               |         |          |         |           |          |         |          |         |         |
|       |            |         |                    |          |            |          |         |                    |             |         |               |         |            |         |               |         |          |         |           |          |         |          |         |         |
|       |            |         |                    |          |            |          |         |                    |             |         |               |         |            |         |               |         |          |         |           |          |         |          |         |         |
|       |            |         |                    |          |            |          |         |                    |             |         |               |         |            |         |               |         |          |         |           |          |         |          |         |         |
|       |            |         |                    |          |            |          |         |                    |             |         |               |         |            |         |               |         |          |         |           |          |         |          |         |         |
|       |            |         |                    |          |            |          |         |                    |             |         |               |         |            |         |               |         |          |         |           |          |         |          |         |         |
|       |            |         |                    |          |            |          |         |                    |             |         |               |         |            |         |               |         |          |         |           |          |         |          |         |         |
|       |            |         |                    |          |            |          |         |                    |             |         |               |         |            |         |               |         |          |         |           |          |         |          |         |         |
|       |            |         |                    |          |            |          |         |                    |             |         |               |         |            |         |               |         |          |         |           |          |         |          |         |         |
|       |            |         |                    |          |            |          |         |                    |             |         |               |         |            |         |               |         |          |         |           |          |         |          |         |         |
|       |            |         |                    |          |            |          |         |                    |             |         |               |         |            |         |               |         |          |         |           |          |         |          |         |         |
|       |            |         |                    |          |            |          |         |                    |             |         |               |         |            |         |               |         |          |         |           |          |         |          |         |         |
|       |            |         |                    |          |            |          |         |                    |             |         |               |         |            |         |               |         |          |         |           |          |         |          |         |         |
|       |            |         |                    |          |            |          |         |                    |             |         |               |         |            |         |               |         |          |         |           |          |         |          |         |         |
|       |            |         |                    |          |            |          |         |                    |             |         |               |         |            |         |               |         |          |         |           |          |         |          |         |         |
|       |            |         |                    |          |            |          |         |                    |             |         |               |         |            |         |               |         |          |         |           |          |         |          |         |         |
|       |            |         |                    |          |            |          |         |                    |             |         |               |         |            |         |               |         |          |         |           |          |         |          |         |         |
|       |            |         |                    |          |            |          |         |                    |             |         |               |         |            |         |               |         |          |         |           |          |         |          |         |         |
|       |            |         |                    |          |            |          |         |                    |             |         |               |         |            |         |               |         |          |         |           |          |         |          |         |         |
|       |            |         |                    |          |            |          |         |                    |             |         |               |         |            |         |               |         |          |         |           |          |         |          |         |         |
|       |            |         |                    |          |            |          |         |                    |             |         |               |         |            |         |               |         |          |         |           |          |         |          |         |         |

## Manganese-barium correlation

Although manganese can be an impurity associated to the sand used for the glass, it is well known from ancient (Theophilus's treatise<sup>6</sup>) and modern (Georges Bontemps's treatise<sup>7</sup>) glassmakers, and has been assessed by successive studies, that manganese was added on purpose to counterbalance the redox equilibrium of iron and correct the greenish color that ferrous iron impurities give to the glass; also known as the "glassmakers soap". A typical earth-abundant mineral known to be used as a source of manganese is pyrolusite ( $\text{MnO}_2$ ). Here, the concentration of manganese is correlated (Figure S-2) with the presence of barium, which suggests that psilomelane ( $(\text{Ba},\text{H}_2\text{O})_2\text{Mn}_5\text{O}_{10}$ ) was also present in the ore used as a source of manganese.

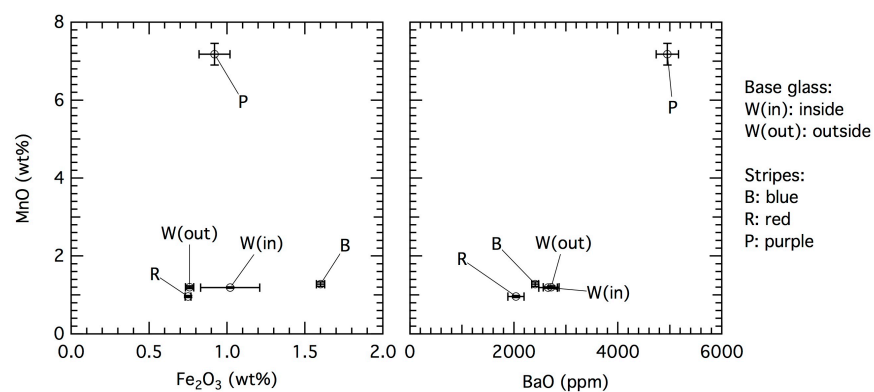

**Figure S-2:** Manganese concentration as a function of the iron (left) and barium content (right). All oxide concentrations are given in wt % of total oxide. The error bars correspond to the standard deviations (Table S-1).

## Manganese in red flashed-glasses

The measured lower concentration of MnO in the red-stripe glass compared to the base glass is consistent with the necessity of minimizing i) in favor of ii). This effect is confirmed in majority by the chemical compositions published in the work of Kunicki-Goldfinger *et al.*<sup>8</sup> (Figure S-3): we observe that for a majority of the glass samples, the iron concentration is slightly higher in the red layer than in the colorless layer (72% of the samples) and that the manganese concentration is slightly lower in the red layer than in the colorless layer (61% of the samples).

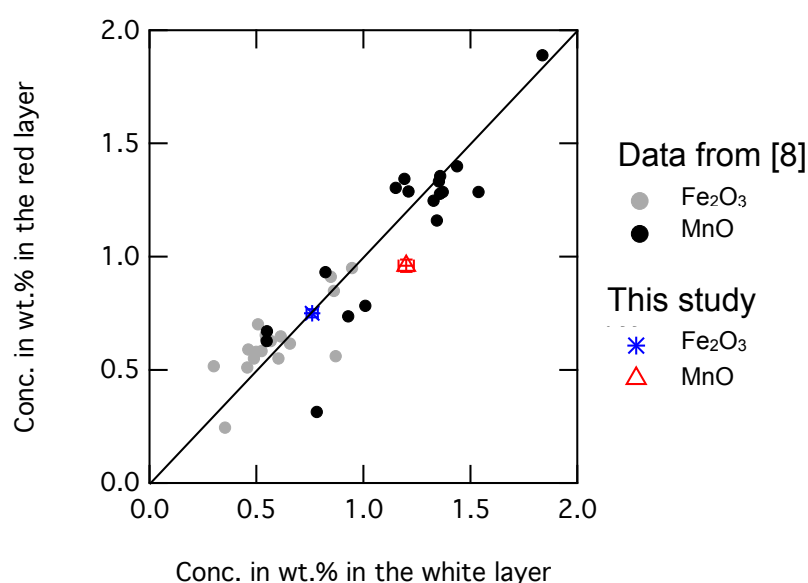

**Figure S-3:** Concentration of chemical element in the red layer as a function of the concentration of the same chemical element in the base glass layer. Data from Kunicki-Goldfinger *et al.*<sup>8</sup> compared to this study (error bars have the same size as the markers). The diagonal line draws the 1:1 ratio.

As an *aparte*, here we would like to underline the importance of obtaining the chemical compositions from the two layers of one glass, as this is the only case where one can be certain that both glasses were made in the same place, at the same time, and therefore, enables detailed discussion on the composition variations in terms of recipe.

## Composition mappings of black opaque staining

The *grisaille* is an opaque brown-black vitreous painting used to make black drawings to prevent transmission of light. The mappings for the internal side of the glass are shown below in Figure S-4. The iron and copper elemental maps of the internal face reveal the shape of the flower painted with *grisaille* opaque paint, which follows the shape of the flower painted on the external face of the glass with yellow-silver paint. The extracted chemical composition and standard deviations are given in Table S-1.

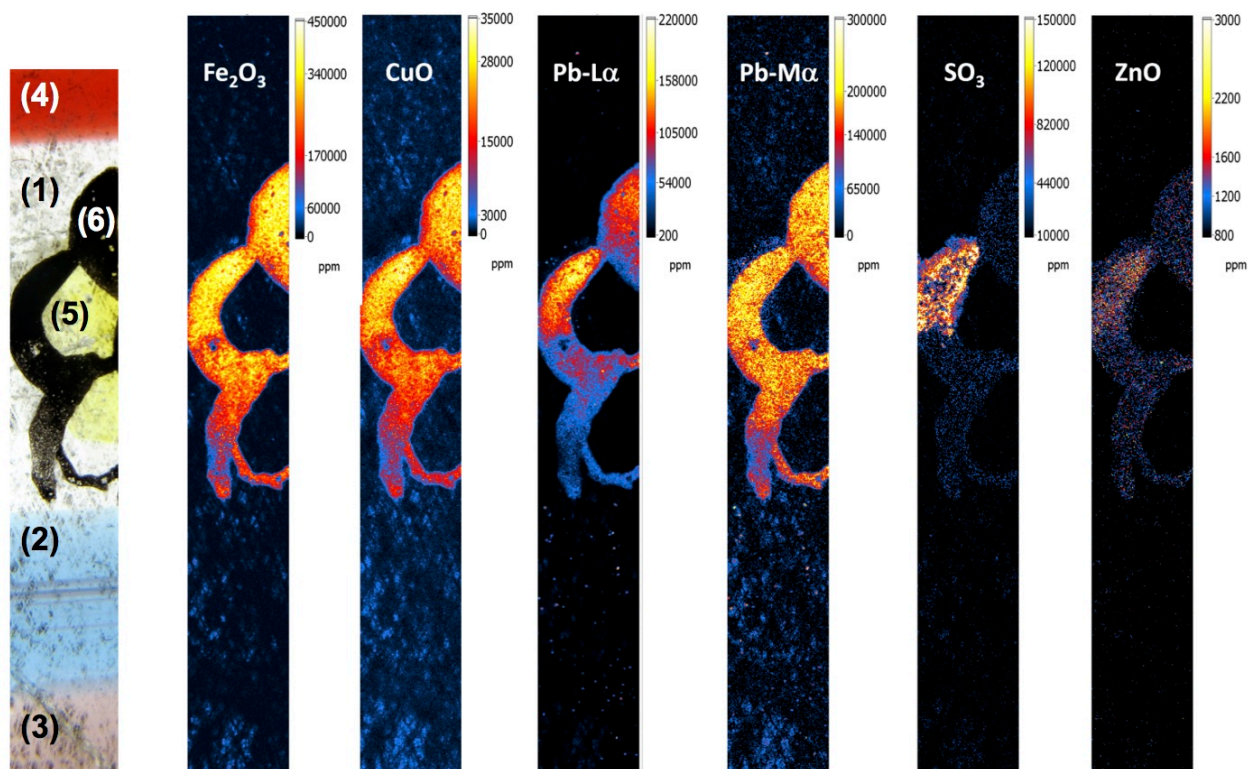

**Figure S-4:** Chemical quantitative mapping of the oxides concentrations of the internal side of the glass, revealing the flower-shape of the black *grisaille* paint.



## References

- (1) Lafond, J. *Le vitrail: origines, technique, destinées*; Perrot, F., Ed.; La Manufacture: Lyon, France, 1988.
- (2) Gatouillat, F.; Lautier, C. In *Vitraux parisiens de la Renaissance*; Leproux, G.-M., Ed.; Paris Son Patrimoine; Délégation à l'action artistique: Paris, 1993.
- (3) Lafond, J. *Arts de France* **1962**, *II*, 246–248.
- (4) Raedt, I. D.; Janssens, K.; Veeckman, J.; Vincze, L.; Vekemans, B.; Jeffries, T. E. *J. Anal. At. Spectrom.* **2001**, *16* (9), 1012–1017.
- (5) Schalm, O.; Janssens, K.; Wouters, H.; Caluwé, D. *Spectrochim. Acta, Part B* **2007**, *62* (6–7), 663–668.
- (6) Freestone, I. C. *Theophilus and the Composition of Medieval Glass*. Symposium J Materials Issues in Art and Archaeology III. 1992.
- (7) Bontemps, G. *Guide du verrier: traité historique et pratique de la fabrication des verres, cristaux, vitraux*; Librairie du Dictionnaire des arts et manufactures: Paris, 1868.
- (8) Kunicki-Goldfinger, J. J.; Freestone, I. C.; McDonald, I.; Hobot, J. A.; Gilderdale-Scott, H.; Ayers, T. *J. Archaeol. Sci.* **2014**, *41*, 89–105.
